## Correspondence

## Coping with Viral Diversity in HIV Vaccine Design: A Response to Nickle et al.

Will Fischer, H. X. Liao, Barton F. Haynes, Norman L. Letvin, Bette Korber

Nickle et al. [1] recently reported a computational method for HIV-1 vaccine antigen design; here we compare this method with our previously published vaccine antigen design method [2], using several criteria that we believe to be important for a successful vaccine candidate [2]. The intent of both approaches is to design a set of vaccine antigens that could protect against diverse circulating strains of HIV-1 by eliciting broad T cell responses. T cells recognize short peptides of 8–12 amino acids, called epitopes, that are presented on the surface of infected cells by human HLA proteins. HIV-1 is highly variable, and both vaccine methods [1,2] attempt to provide coverage of most common variants of epitope-length fragments in HIV-1 proteins [3].

The two methods use very different computational strategies, but both achieve high coverage of potential epitopes. The COT+ method generates an antigen set consisting of one full-length synthetic sequence supplemented by a set of sequence fragments [1]. Initially, the Center of Tree (COT) sequence is computed based on a maximum likelihood phylogenetic tree inferred for a set of test sequences [4]. The “center” of the tree is identified as the point that minimizes the distances to the terminal branches, and the evolutionary model and tree topology are used to reconstruct the most likely sequence at that center point of the tree [4]. Like an inferred most recent common ancestral sequence [5], a COT sequence is an estimate of an historical entity, based on a concatenation of the most likely nucleotide at each position. The COT+ antigen design method uses the COT sequence as a foundation, and builds on it by sequential addition of protein fragments selected to provide enhanced potential epitope coverage [6]. These fragments are selected using a sliding window across all sequences; peptides are scored by the level of additional coverage they provide, and the highest-scoring fragments are added to the set, with fragments being overlapped where possible. The result is the COT+ sequence set: the full-length COT sequence plus a set of additional sequence fragments of varying lengths (Table 1, Figure 1). The summed length of all fragments are considered in units of “protein lengths”; Nickle et al. [1] illustrate the use of two protein lengths of peptides in addition to the COT protein, for a total of three gene length equivalents. They also provide an option of assembling the fragments into linear proteins (but this provided reduced population coverage relative to the basic COT+ method) [1].

In contrast, the mosaic method that we recently described [2] assembles a specified number of full-length protein sequences that in combination optimize coverage of epitope length peptides in a population. This method creates intact HIV proteins that have the potential for natural expression and processing of epitopes. We employed a genetic algorithm to generate sets of sequences by *in silico* recombination of natural protein sequences. Starting with randomly

recombined natural sequences, the algorithm proceeds by a series of iterations of recombination and selection, optimizing for 9-mer coverage of the input sequences. The result is a small set of full-length protein sequences that collectively approach the upper bound on coverage attainable for a given number of proteins [2].

We designed a three-mosaic protein set using the same input data as Nickle et al. to directly compare the two methods using the same metric as Nickle et al. The mosaic set, despite being constrained to use full-length proteins, performed slightly better in terms of 9-mer coverage than three protein lengths using COT+ (Figure 2). The mosaics used three full-length protein sequences, however, compared to 38 fragments for Gag and 15 for Nef included in the optimal coverage COT+ antigen design (Figure 1, Table 1).

The processing of antigens that ultimately results in the presentation of epitopes is not completely understood. Therefore, a critical issue for the COT+ method is a strategy for assembling the peptide fragments into antigens that would be practical for vaccine delivery. It is possible to simply concatenate the fragments, but this creates large numbers of spurious 9-mers at the junctions (up to eight at each junction; see Table 1), and may impact processing of embedded epitopes in the context of the assembled fragments.

Some recent experimental results illustrate that problems can occur at unnatural boundaries in polyproteins. We initially designed mosaic protein sets for Env, Gag, Pol, and Nef [2], although we highlighted creating mosaics from Gag and the conserved center of Nef [2]. Nef is highly variable, but is relatively conserved near the center of the protein, where the most intense and frequent T cell responses have been observed in the setting of natural infection [7]. Therefore, we excluded the variable regions of Nef and generated a single fusion protein comprising a mosaic full-length Gag plus the relatively conserved center of Nef. The Gag+central Nef fusion gene construct was cloned into a DNA vaccine vector and transfected into 293T cells. Protein expression was evaluated by Western blot analysis using HIV-specific MAbs (241-D, Gag; 6.2 and EH1, Nef). The mosaic polyprotein was larger than a Gag protein, as expected, and Gag-specific cellular immune responses were detected by IFN- $\gamma$  Elispot assay in splenocytes from mice immunized with this polyprotein construct; however, Nef-specific responses were

**Table 1.** Number of Proteins or Protein Fragments Included in the Antigen Design, and the Number of Rare or Unique 9-mers in Various Protein Sets

| Antigen Set           | Rare 9-mers<br>( $n < 3$ ) | Unnatural 9-mers<br>( $n = 0$ ) | Number of<br>Fragments |
|-----------------------|----------------------------|---------------------------------|------------------------|
| Gag COT+              | 4                          | 53                              | 38                     |
| Gag COT+ concatenated | 6                          | 324                             | 3                      |
| 3 Gag Mosaics         | 0                          | 0                               | 3                      |
| Nef COT+              | 9                          | 5                               | 15                     |
| Nef COT+ concatenated | 11                         | 90                              | 3                      |
| 3 Nef Mosaics         | 0                          | 0                               | 3                      |

doi:10.1371/journal.pcbi.0040015.t001

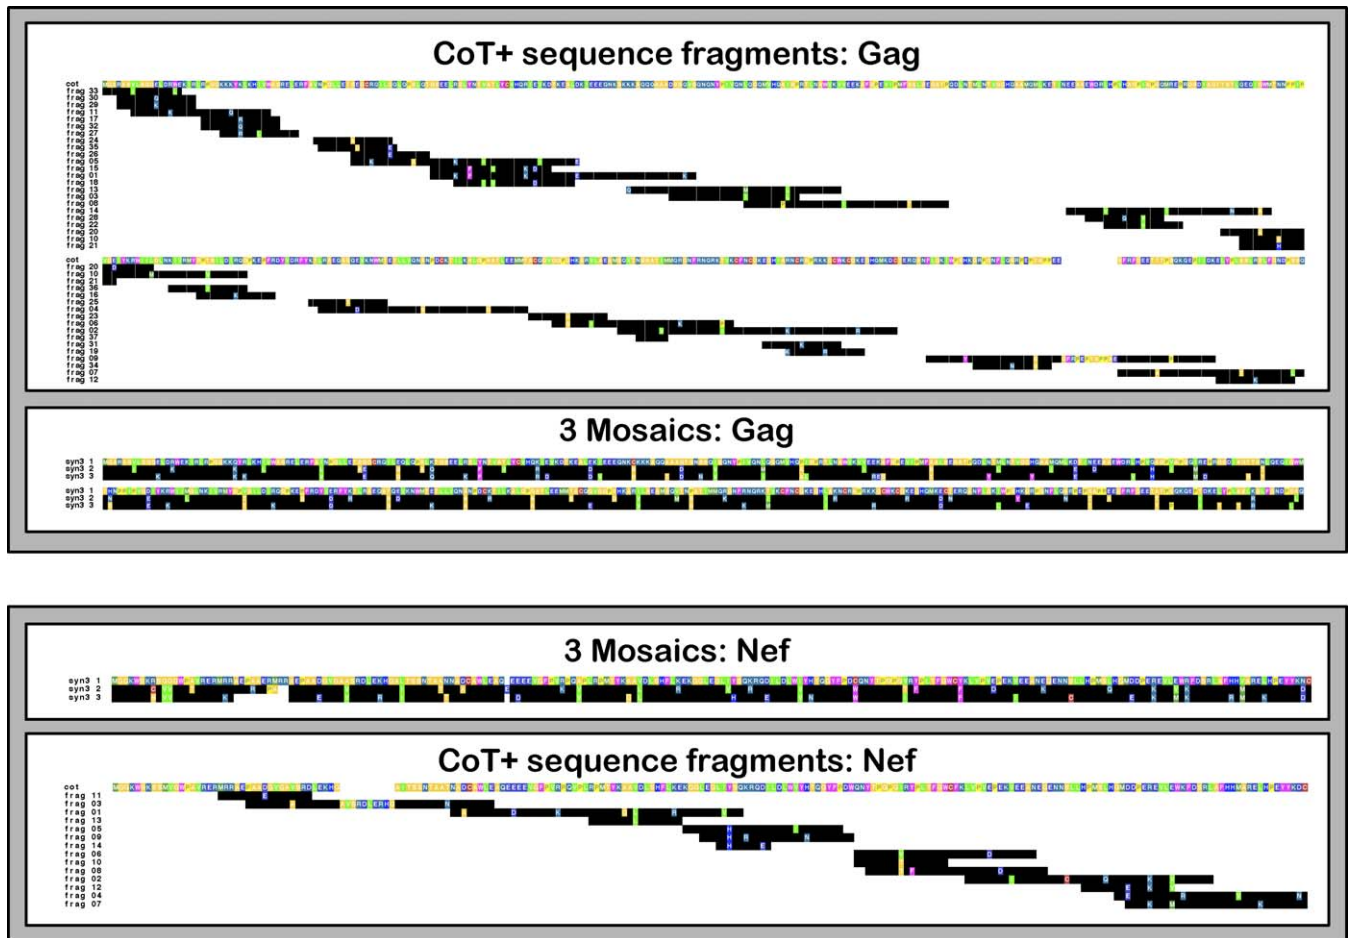

doi:10.1371/journal.pcbi.0040015.g001

**Figure 1.** Relative Locations and Sequence Identities of Potential Vaccine Antigens

The COT+ candidate vaccine sets represent one full-length COT protein plus numerous discrete sequence fragments located in various positions relative to the intact Gag protein; mosaics are full-length “native-like” proteins. For the COT+ sequence sets, the sequence on the top line is the COT sequence; additional peptide fragments are numbered by addition order, and plotted by location from N-terminus to C-terminus. Gag sequences are presented in two parts. For the mosaic sets, the sequence in the top line was arbitrarily chosen from the set, as the mosaics are designed as a combination of strains. For all sequence sets, amino acid residues identical to those in the top line sequence are shown with a black background; differences from the first sequence are shown in color, with different colors representing different amino acid classes; white space is used to represent gaps. The COT+ antigen sequences [1] were generously provided by J. I. Mullins.

not detected. Furthermore, using recombinant Gag and Nef protein as coating antigens in an ELISA, we detected anti-Gag but not anti-Nef antibody responses in these mice. Thus, this Gag/Nef fusion construct expresses Gag and elicits Gag-specific immune responses, but does not induce anti-Nef antibody or T cell responses *in vivo*. These results demonstrate that unnatural linking of polypeptides can have unexpected and undesirable consequences, and that appropriate assembly of peptides can be a nontrivial endeavor.

Another important aspect of mosaic protein design is the explicit exclusion of unnatural or very rare epitope-length fragments [2]. While the excellent coverage of Mosaics illustrates that this approach captures more rare variants than other approaches (such as combining optimized natural strains or sets of consensus sequences) [1,2], unique or extremely rare variants are excluded at a user-specified rarity threshold. Including such fragments in a vaccine has the potential to elicit T cell responses that are unlikely to provide cross-protection against circulating strains, and could even divert vaccine-induced T cell responses from conserved

epitopes that are relevant for protection. We therefore set a threshold such that all nine amino acid-length fragments that are incorporated into mosaic proteins are found a minimum of three times in the input data. In contrast, despite algorithmic “smoothing” [1], the COT+ protein fragments contain multiple rare and unnatural 9-mers (Table 1).

An exciting potential of this type of strategy is that it may provide an approach for making a global HIV vaccine. We previously compared mosaic vaccine design at three levels: regional, within-subtype, and global [2]; in contrast, COT+ was initially applied only to the B subtype [1]. The C subtype regional comparison was based on a large South African sequence dataset [8] compared to the non-South African C subtype Los Alamos database sequences; there was no discernable advantage in creating a South African-specific mosaic versus a global C subtype mosaic vaccine in terms of coverage of South African diversity [2]. We then compared B and C subtype mosaics with mosaics designed for the entire HIV-1 M group. We found that optimizing using one HIV subtype results in a dramatic reduction in coverage of other

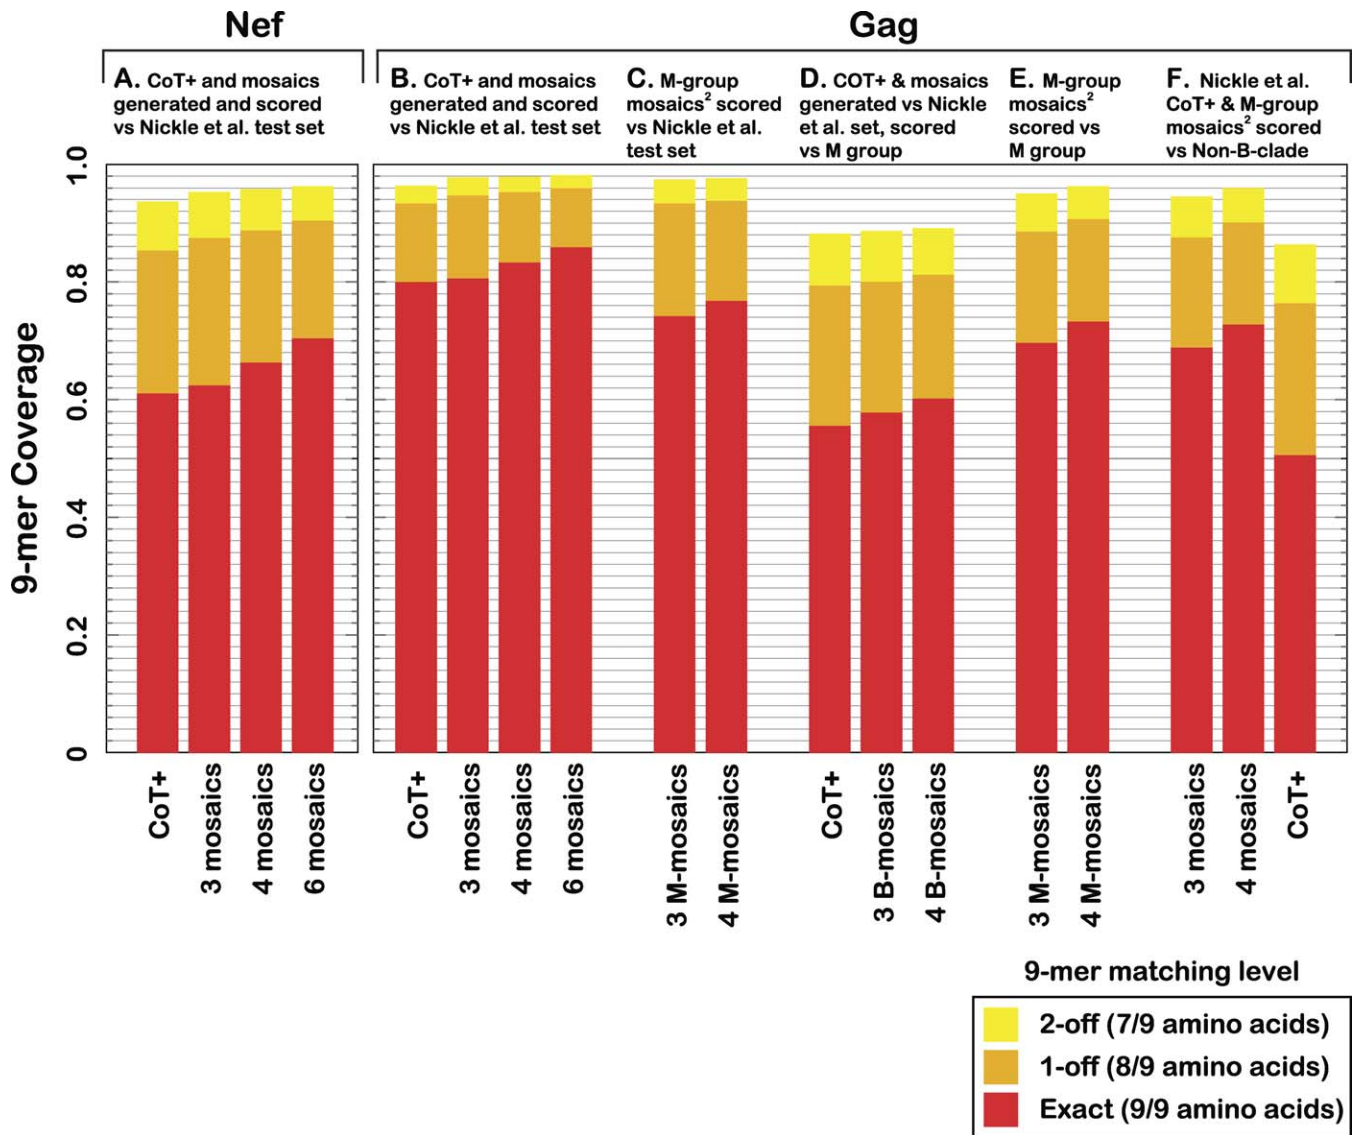

doi:10.1371/journal.pcbi.0040015.g002

**Figure 2.** Comparisons of 9-mer Coverage for the COT+ and Mosaic Antigen Designs

To allow direct methodological comparison, mosaic antigen sets were generated as in Fischer et al. [2], but based on the test set of 169 sequences used in Nickle et al. [1] for Nef (A) and Gag (B,D). Potential epitope coverage provided by the combination of proteins is indicated by the percentage of perfectly matched 9-mers in the protein alignment (red), the addition of those that match in 8/9 amino acids (orange), and the further addition of those that match in 7/9 amino acids (yellow). Three full-length mosaic proteins provide slightly better coverage than three gene lengths of COT+ protein fragments. For this class of methods, coverage may generally be improved by increasing the number of antigens, but with diminishing returns and at the cost of increased vaccine complexity and expense; the best strategy must realistically balance these factors. Previously published mosaic sequences (based on 551 Los Alamos sequences spanning the entire M group [2]) were scored against the 169-sequence Gag set (C), and the M group (E). To directly compare the coverage of each antigen set to subtypes other than B, the COT+ antigen set and the M-group mosaics were also scored against an M-group dataset from which all B-clade sequences had been removed (F).

The M-group mosaic coverage of non-B clade proteins is 4%–5% less than the M-group coverage of B clade (C,F). Predictably, interclade coverage of the B-clade-optimized antigens drops dramatically (81% → 51% for COT+, F; B-clade mosaics slightly less reduced ([2], unpublished data). For the M-group global mosaics, in contrast, coverage is roughly equal for all clades; coverage of B-clade sequences by M-group mosaics is only 6%–7% below that of specific B-clade-optimized mosaics (B,C), and coverage of non-B sequences remains relatively high (F).

All computer code for creating mosaics and assessing coverage, our previously designed mosaic antigens, and the datasets used were made publicly accessible upon the original publication [2].

subtypes (generally about 25% for Gag and the Nef mosaics [2], also see Figure 2E for a COT comparison). In contrast, mosaics designed using a large and representative set of M group proteins from the Los Alamos database gave only slightly lower coverage for any given subtype compared to within-subtype optimized mosaics [2]—the tradeoff for this relatively small loss of coverage is the potential for much broader (i.e., global) coverage. In Figure 2C, we show the 9-mer coverage of the M

group Gag mosaics designed using the global set of M group sequences from the Los Alamos database. Coverage is comparable (within a few percent) for all subtypes tested [2] as well as for the test set from Nickle et al. [1] (Figure 2D).

In conclusion, although the COT+ method is an interesting and algorithmically creative suggestion for vaccine design, the Mosaic approach has several advantages. Nickle et al. [1] note that “more computational intensive approaches such as

genetic algorithm searches . . . could also be brought to bear on the problem of antigen design.” Indeed, we have already applied such an approach and were able to achieve levels of coverage approaching the achievable upper bound, without sacrificing the linear protein sequence, and with the advantage of excluding rare epitope-length variants [2]. In contrast, the antigen sets generated by the COT+ method are either fragmented pieces of protein, or a subset of those fragments joined in a linear protein sequence that provides suboptimal coverage [1]. The most important result of our mosaic vaccine study is that it may provide a tractable approach for global vaccine design: high coverage of viral variability is presented in a feasible number of intact antigens for a vaccine cocktail. ■

Will Fischer (wfischer@lanl.gov)

Los Alamos National Laboratory  
Los Alamos, New Mexico, United States of America

Bette Korber

Los Alamos National Laboratory  
Los Alamos, New Mexico, United States of America  
Santa Fe Institute  
Santa Fe, New Mexico, United States of America

H. X. Liao

Barton F. Haynes

Duke University  
Durham, North Carolina, United States of America

Norman L. Letvin

Harvard-Beth Israel Deaconess Medical Center  
Boston, Massachusetts, United States of America

#### References

1. Nickle DC, Rolland M, Jensen MA, Pond SL, Deng W, et al. (2007) Coping with viral diversity in HIV vaccine design. *PLoS Comput Biol* 3: e75. doi:10.1371/journal.pcbi.0030075
2. Fischer W, Perkins S, Theiler J, Bhattacharya T, Yusim K, et al. (2007) Polyvalent vaccines for optimal coverage of potential T-cell epitopes in global HIV-1 variants. *Nat Med* 13: 100–106.
3. Li F, Malhotra U, Gilbert PB, Hawkins NR, Duerr AC, et al. (2006) Peptide selection for human immunodeficiency virus type 1 CTL-based vaccine evaluation. *Vaccine* 24: 6893–6904.
4. Nickle DC, Jensen MA, Gottlieb GS, Shriner D, Learn GH, et al. (2003) Consensus and ancestral state HIV vaccines. Letter in response to Gaschen et al. [5]. *Science* 299: 1515–1518.
5. Gaschen B, Taylor J, Yusim K, Foley B, Gao F, et al. (2002) Diversity considerations in HIV-1 vaccine selection. *Science* 296: 2354–2360.
6. Jojic N, Jojic V, Frey B, Meek C, Heckerman D (2005) Using “epitomes” to model genetic diversity: Rational design of HIV vaccine cocktails. In: Weiss Y, Schölkopf B, Platt J, editors. Vancouver (British Columbia): MIT Press, 587–594.
7. Frahm N, Korber BT, Adams CM, Szinger JJ, Draenert R, et al. (2004) Consistent cytotoxic-T-lymphocyte targeting of immunodominant regions in human immunodeficiency virus across multiple ethnicities. *J Virol* 78: 2187–2200.
8. Kiepiela P, Leslie AJ, Honeyborne I, Ramduth D, Thobakgale C, et al. (2004) Dominant influence of HLA-B in mediating the potential co-evolution of HIV and HLA. *Nature* 432: 769–775.

**Citation:** Fischer W, Liao HX, Haynes BF, Letvin NL, Korber B (2008) Coping with viral diversity in HIV vaccine design: A response to Nickle et al. *PLoS Comput Biol* 4(1): e15. doi:10.1371/journal.pcbi.0040015

**Copyright:** © 2008 Fischer et al. This is an open-access article distributed under the terms of the Creative Commons Attribution License, which permits unrestricted use, distribution, and reproduction in any medium, provided the original author and source are credited.

**Funding:** This research is supported by a Los Alamos National Laboratory research and development grant (LDRD) and by the NIH, HIV-RAD PO1 AI61734.

**Competing Interests:** We have an invention disclosure on the previously published mosaic sequences, but the methods and software we have developed are freely available.

## Comparison of Immunogen Designs That Optimize Peptide Coverage: Reply to Fischer et al.

David C. Nickle, Nebojsa Jojic, David Heckerman, Vladimir Jojic, Darko Kirovski, Morgane Rolland, Sergei Kosakovsky Pond, James I. Mullins

In our paper “Coping with Viral Diversity in HIV Vaccine Design” [1], we presented several approaches to incorporate viral variability within vaccine immunogens, including judicious choice of natural strains. Most of our approaches included at least one collinear gene length corresponding to the Center-of-Tree (COT) sequence, which has near-optimal peptide coverage for a single gene. Inclusion of a COT sequence and optimizing the rest of the immunogen for coverage, as suggested in [2], yielded a construct (COT+) with the greatest coverage of peptide diversity, minimally sacrificing peptide coverage in comparison with unconstrained diversity optimization. Fischer et al. [3] introduced mosaics—a different approach to increasing coverage while maintaining collinearity using an optimization algorithm based on simulated recombination.

In their response to Nickle et al. [1], Fischer et al. [4] suggest that maintaining full collinearity of viral gene sequences with native viral proteins is the only tractable approach to producing immunogens inclusive of viral variability. This claim was based on the observation that mosaics had slightly higher coverage than COT+ at 3× and 4× strain lengths, despite the fact that all mosaic components are constrained to be collinear with the full gene. However, as we pointed out, a variety of optimization algorithms can be used to perform coverage optimization, with computationally intensive approaches typically yielding better results. Figure 1 compares the coverage of mosaics with COT+ constructs produced by two optimization algorithms—the simple greedy extension described in Nickle et al. [1], which can be implemented in hours and run in seconds on any modern personal computer, and the more complex combinatorial optimization approach of [5] run for one day on a cluster of 300 PCs. We also include the coverage of a construct optimized without any collinearity constraints, derived using the Kirovski et al. [5] algorithm. The coverage of COT+ created by combinatorial optimization is greater than that of mosaics, especially at larger lengths where even the simple greedy algorithm surpasses the mosaic coverage. Furthermore, the optimized COT+ coverage is almost identical to the coverage of constructs optimized with no collinearity constraints, indicating that the price for imposing a constraint on the immunogen to include a single virus-like strain is small.

Fischer and colleagues also argued that COT+ creates unnatural peptide sequences by concatenation. However, similar concatenation of their mosaics would have produced about 18 unnatural 9-mer peptides. Furthermore, the COT+ approach can be tuned to both penalize the introduction of unnatural peptides on concatenation, and to define the number of segments to be separately expressed, and thus reduce the requirement for concatenation. Several additional inferences were made in the response by Fischer

et al. that should be commented upon. First, COT+ may, of course, be optimized for arbitrary HIV clades or combinations of clades, but the publication of our paper in *PLoS Computational Biology* reflects our focus on approaches to immunogen design rather than on the production of an exhaustive series of constructs. Also, just as in the mosaic approach, COT+ can be optimized to exclude rare variants (referred to as smoothing in our paper).

Fischer et al. also discussed disappointing unpublished findings on the immunogenicity induced against Nef by a construct obtained by fusing a full-length Gag gene and the central portion of the Nef gene. However, these results can only be fairly assessed in light of what would be expected for the full-length Nef protein, and in the case of cellular immune responses, in the context of the same MHC specificities. However, these controls were not provided. We certainly agree that there are substantial challenges to the establishment of a multivalent CD8 response, yet multiple strategies have been and are being devised to overcome this important problem. For example, different groups have shown that CD8+ T cell responses can be successfully elicited against CD8+ T cell epitope strings when they are separated by short linker sequences and not in the context of the native protein, implying that they can be processed and presented in vivo [6–11].

Finally, despite 25 years of AIDS research and intensive yet uniformly failed efforts to develop an AIDS vaccine, the scientific community is poorly positioned to determine which, if any, approach to vaccine immunogen design will prove successful. Thus, arguing over methodologies developed with the same goal of incorporating variability has little significance as long as we do not know whether maximizing variability or inclusion of the entire full-length viral proteins are valid strategies. It may very well be that removing certain epitopes could be a more judicious approach than an overall epitope maximization strategy [12]. Indeed, the flexibility afforded by the COT+ approach, which is not limited to full-length proteins, may well prove superior to immunization with full-length viral protein immunogens. ■

David C. Nickle  
Rosetta Inpharmatics  
Seattle Washington, United States of America

Morgane Rolland  
James I. Mullins (jmullins@u.washington.edu)  
University of Washington School of Medicine  
Seattle, Washington, United States of America

David Heckerman  
Darko Kirovski  
Microsoft Research  
Redmond, Washington, United States of America

Vladimir Jovic  
Stanford University  
Stanford, California, United States of America

Sergei Kosakovsky Pond  
University of California San Diego  
La Jolla, California, United States of America

#### References

1. Nickle DC, Rolland M, Jensen MA, Pond SL, Deng W, et al. (2007) Coping with viral diversity in HIV vaccine design. *PLoS Comput Biol* 3: e75. doi:10.1371/journal.pcbi.0030075
2. Jovic N, Jovic V, Frey B, Meek C, Heckerman D (2005) Using epitomes to model genetic diversity: Rational design of HIV vaccine cocktails. In: *Proceedings of the 19<sup>th</sup> Annual Conference on Neural Information Processing Systems*; 5–10 December 2005; Whistler, British Columbia, Canada.
3. Fischer W, Perkins S, Theiler J, Bhattacharya T, Yusim K, et al. (2007) Polyvalent vaccines for optimal coverage of potential T-cell epitopes in global HIV-1 variants. *Nat Med* 13: 100–106.
4. Fischer W, Liao HX, Haynes BF, Letvin NL, Korber B (2007) Coping with viral diversity in HIV vaccine design: A response to Nickle et al. *PLoS Comput Biol* 4: e15. doi:10.1371/journal.pcbi.0040015
5. Kirovski D, Heckerman D, Jovic N (2007) Combinatorics of the vaccine design problem: Definition and an algorithm. Microsoft Research Technical Report MSR-TR-2007-2148.
6. Dorrell L (2006) Therapeutic immunization for the control of HIV-1: Where are we now? *Int J STD AIDS* 17: 436–441.
7. Goonetilleke N, Moore S, Dally L, Winstone N, Cebere I, et al. (2006) Induction of multifunctional human immunodeficiency virus type 1 (HIV-1)-specific T cells capable of proliferation in healthy subjects by using a prime-boost regimen of DNA- and modified vaccinia virus Ankara-vectored vaccines expressing HIV-1 Gag coupled to CD8+ T-cell epitopes. *J Virol* 80: 4717–4728.
8. Subbramanian RA, Kuroda MJ, Charini WA, Barouch DH, Costantino C, et al. (2003) Magnitude and diversity of cytotoxic-T-lymphocyte responses elicited by multiepitope DNA vaccination in rhesus monkeys. *J Virol* 77: 10113–10118.
9. Subbramanian RA, Charini WA, Kuroda MJ, Seaman M, Chhay H, et al. (2006) Expansion after epitope peptide exposure in vitro predicts cytotoxic T lymphocyte epitope dominance hierarchy in lymphocytes of vaccinated mamu-a\*01+ rhesus monkeys. *AIDS Res Hum Retroviruses* 22: 445–452.
10. De Groot AS, Marcon L, Bishop EA, Rivera D, Kutzler M, et al. (2005) HIV vaccine development by computer assisted design: The GAIA vaccine. *Vaccine* 23: 2136–2148.
11. Thomson SA, Jaramillo AB, Shoobridge M, Dunstan KJ, Everett B, et al. (2005) Development of a synthetic consensus sequence scrambled antigen HIV-1 vaccine designed for global use. *Vaccine* 23: 4647–4657.
12. Rolland M, Nickle DC, Mullins JI (2007) HIV-1 group M conserved elements vaccine. *PLoS Pathogens* 3: e157. doi:10.1371/journal.ppat.0030157
13. Jovic N, Frey B, Kannan A (2003) Epitomic analysis of appearance and shape. Washington (D.C.): IEEE Computer Society. pp. 34–43.

**Citation:** Nickle DC, Jovic N, Heckerman D, Jovic V, Kirovski D, et al. (2008) Comparison of immunogen designs that optimize peptide coverage: Reply to Fischer et al. *PLoS Comput Biol* 4(1): e25. doi:10.1371/journal.pcbi.0040025

**Copyright:** © 2008 Nickle et al. This is an open-access article distributed under the terms of the Creative Commons Attribution License, which permits unrestricted use, distribution, and reproduction in any medium, provided the original author and source are credited.

**Funding:** The authors received no specific funding for this article.

**Competing Interests:** The authors have declared that no competing interests exist.
